# Supplementary material
Source: PubMed Central journal article supplement (PMC1634789)
Supplement: rspb20063515s12.pdf [file rspb20063515s12.pdf]

## Shalchian-Tabrizi et al. 2006

### Supplemental material

**Table S1**

Species names and accession numbers of SSU sequences other than used by Berney et al. (2004) and Hsp90, alpha-tubulin and beta-tubulin protein sequences used in the phylogenetic analyses.

| SPECIES                               | SSU      | Hsp90    | Alpha-tubulin | Beta-tubulin |
|---------------------------------------|----------|----------|---------------|--------------|
| <i>Achlya ambisexualis</i> (1)        |          | AAM90674 |               |              |
| <i>Achlya klebsiana</i> (1)           |          |          |               | A35885       |
| <i>Amastigomonas marina</i> (2)       |          | AAP72156 |               |              |
| <i>Arabidopsis thaliana</i>           |          | BAB09283 | AAL16174      | AAM10035     |
| <i>Cercomonas ATCC50319</i> (3)       |          |          | AAC67375      |              |
| <i>Cercomonas ATCC50316</i> (3)       |          |          |               | AAD55354     |
| <i>Chaunacanthid 217</i>              | AF063241 |          |               |              |
| <i>Chlamydomonas stercoraria</i>      | AY268042 |          |               |              |
| <i>Cryptothecodinium cohnii</i>       |          | AAM02974 |               | AAM02970     |
| <i>Cryptosporidium parvum</i>         |          | AAR83923 | BAC07246      |              |
| <i>Cyanoptyche gloeocystis</i>        | AJ007275 |          |               |              |
| <i>Dictostelium discoideum</i>        |          | AAA69917 |               |              |
| <i>Diphylleia rotans</i>              | AF420478 |          |               |              |
| <i>Diplonema papillatum</i> (4)       |          | AAM93745 |               |              |
| <i>Danio rerio</i>                    |          | AAH65359 | NP 919369     | AAN33030     |
| <i>Drosophila melanogaster</i>        | M21017   | AAF47734 | P06604        | B27810       |
| <i>Euglena gracilis</i>               |          | AAQ24862 | CAA80497      | AAK37834     |
| <i>Glaucocystis nostochinearum</i>    | X70803   |          |               |              |
| <i>Goniomonas sp</i> (5)              |          | AAP72158 |               |              |
| <i>Goniomonas truncata</i> (5)        |          |          | AAD02566      | AAD02567     |
| <i>Guillardia theta</i>               |          | AAX10949 |               |              |
| <i>Hartmannella vermiformis</i>       | AF426157 |          |               |              |
| <i>Heterocapsa triquetra</i>          |          | AAR27541 | AAO49341      | AAO49343     |
| <i>Homo sapiens</i>                   |          | XP084514 | NP 006073     | AAH24038     |
| <i>Imantonia rotunda</i> (6)          |          |          | XXXXXX        | XXXXXX       |
| <i>Isochrysis galbana</i>             |          | AAX10942 |               |              |
| <i>Leishmania donovani</i> (7)        |          | AAA29252 | AAA58321      |              |
| <i>Leishmania major</i> (7)           |          |          |               | CAA63780     |
| <i>Marine microheliozoan TCS 2002</i> | AF534711 |          |               |              |
| <i>Monosiga brevicollis</i>           | AF174375 | AAP51213 | AAK27410      | AAK27411     |
| <i>Naegleria gruberi</i>              |          | AAM93756 | P11237        | CAA78362     |
| <i>Ochromonas sp.</i>                 |          | AAP72159 |               |              |
| <i>Oryza sativa</i>                   |          | BAD04054 | CAA62916      | BAC82429     |
| <i>Oxyrrhis marina</i>                |          | AAR27544 | AAO49332      | AAO49333     |
| <i>Paramecium tetraurelia</i>         |          | AAG00569 | CAA67847      | CAE75646     |
| <i>Pavlova lutheri</i> (8)            |          | AAX10944 |               |              |
| <i>Perkinsus marinus</i>              |          | AAR27545 | AAO49328      | AAO49330     |
| <i>Phalansterium solitarium</i>       | AF280078 |          |               |              |
| <i>Plasmodium falciparum</i>          |          | CAA82765 | NP704579      | A44949       |
| <i>Prymnesium parvum</i>              |          | AAX10951 |               |              |
| <i>Prymnesium patelliferum</i> (6)    |          | AAP72161 |               |              |
| <i>Raphidiophrys ambigua</i>          | AY305008 |          |               |              |

|                                           |          |           |           |          |
|-------------------------------------------|----------|-----------|-----------|----------|
| <i>Schizosaccharomyces pombe</i>          |          | NP 594365 | NP 596774 |          |
| <i>Streblomastix strix</i>                |          | AAO46121  |           |          |
| <i>Spumella danica</i> (9)                | AJ236861 |           |           |          |
| <i>Spumella uniguttata</i> (9)            |          | AAR27540  |           |          |
| <i>Telonema antarcticum</i>               | AJ564773 | XXXXXX    | XXXXXX    | XXXXXX   |
| <i>Telonema subtilis</i> (RCC358.7)       | AJ564772 |           |           |          |
| <i>Telonema subtilis</i> (RCC404.5)       | AJ564771 | XXXXXX    | XXXXXX    | XXXXXX   |
| <i>Tetrahymena pyriformis</i>             |          | AAG00567  | CAA31256  | CAA31258 |
| <i>Thaumatomonas sp.</i> (3)              | U42446   | AAP72162  |           |          |
| <i>Toxoplasma gondii</i>                  |          | AAQ24837  | M20024    | S16340   |
| <i>Trimastix pyriformis</i> ATCC50598     | AF244904 |           |           |          |
| Uncultured eukaryotic clone CCA32         | AY179990 |           |           |          |
| <i>Trypanosoma cruzi</i>                  |          | A26125    | AAL75955  | AAL75957 |
| Uncultured <i>Telonema</i> (RA001219.10)  | AJ564769 |           |           |          |
| Uncultured <i>Telonema</i> (RA010412.17)  | AJ564767 |           |           |          |
| Uncultured <i>Telonema</i> (RA000412.136) | AJ564768 |           |           |          |
| Uncultured <i>Telonema</i> (BL010625.25)  | AJ564770 |           |           |          |
| Uncultured <i>Oxymonas sp.</i>            | AB092932 |           |           |          |
| <i>Zea maize</i>                          |          | AAB26482  | CAA44862  | CAA37060 |

1. The *Achlya ambisexualis* and *A. klebsiana* sequences were concatenated, named as *Achlya* in Fig. S1.
2. The *Amastigomonas marina* and the *Amastigomonas debruynei* were concatenated and named *Amastigomonas* in Fig. 3
3. The *Cercomonas* and *Thaumatomonas sp.* sequences were concatenated and denoted as *Cercozoa* in Fig S1.
4. The *Diplonema papillatum* and *Diplonema ambulator* were concatenated and named *Diplonema* in Fig. 3.
5. The *Goniomonas sp.* and *G. truncata* were concatenated and named *Goniomonas* in Fig.S1 and Fig. 3.
6. The *Prymnesium patelliferum* and *Imantonia* sequences were concatenated and named as *Prymnesium* in Fig S1.
7. The *Leishmania donovani* and *L. major* were concatenated and named *Leishmania* in Fig. S1.
8. The *Pavlova lutheri* and *Pavlova salina* were concatenated and named *Pavlova* in Fig. 3.
9. The *Spumella danica* and *Spumella uniguttata* were concatenated and named *Spumella* in Fig. 3

**Table S2**

Comparison of significant ultrastructures in katablepharids / *Leucocryptos* and *Telonema*.

| <b>Structure</b>                                                           | <b>Kathablepharids/<br/>Leucocryptos</b>                                                                                                    | <b>Telonemia</b>                                                                                                                                                                       | <b>References and<br/>comments</b>                                                                                                          |
|----------------------------------------------------------------------------|---------------------------------------------------------------------------------------------------------------------------------------------|----------------------------------------------------------------------------------------------------------------------------------------------------------------------------------------|---------------------------------------------------------------------------------------------------------------------------------------------|
| General cell morphology                                                    | Droplet or sausage, flagella with parallel bases close to broad end, where cytostome is located                                             | Droplet, flagella with non-parallel bases at narrow end.<br>Cytopharyngeal area at ventral side close to broad end                                                                     | Vörs 1992, Kugrens & Clay 2003, Klaveness et al. 2005                                                                                       |
| Glycocalyx (stainable polysaccharide coating <i>outside</i> cell membrane) | Present                                                                                                                                     | Absent                                                                                                                                                                                 | Vörs 1992, Kugrens & Clay 2003, Klaveness et al. 2005.                                                                                      |
| Peripheral vacuoles (or cortical alveoli)                                  | Probably absent, due to presence of ribosomes on similar structure                                                                          | Likely present                                                                                                                                                                         | Kugrens & Clay 2003, Klaveness et al. 2005.                                                                                                 |
| Subcortical microtubuli and cytostome/cytopharyngeal structure             | Present in intracellular bundles trailing the entire length of cell, particularly directed towards and part of the cytopharyngeal structure | Present as part of the intracellular and highly dynamic subcortical lamina. No highly differentiated cytopharyngeal structure related to that of Kathablepharids/Leucocryptos detected | Subcortical microtubuli in bundles and sheets are generally present in many groups, like the euglenoids and particularly in trypanosomes.   |
| Rigid flagellar hairs                                                      | Unknown                                                                                                                                     | Present on large member of genus                                                                                                                                                       | Klaveness et al. 2005, see Cavalier-Smith 1993 on the significance of this structure for classification                                     |
| Ejectisomes                                                                | Single roll of flat tape, related to those of crypto- and prasinomonads                                                                     | Unknown or very different                                                                                                                                                              | See Lee & Kugrens 1991, and Vörs 1992 for details. Klaveness et al. 2005 only refer briefly to very different "small spherical structures". |

## References:

- Cavalier-Smith, T. 1993 The protozoan phylum Opalozoa. *J. Eukaryot. Microbiol.* 40, 609-615.
- Klaveness, D., Shalchian-Tabrizi, K., Thomsen, H. A., Eikrem, W. & Jakobsen, K. S. 2005 *Telonema antarcticum* sp.nov., a common marine phagotrophic flagellate. *Int. J. Syst. Evol. Micr.* 55, 2595-2604.
- Kugrens, P. & Clay, B.L. 2003 Cryptomonads. In: Wehr, J.D. & Sheath, R.G. (eds.) 2003. *Freshwater algae of North America. Ecology and Classification*, pp. 715-755. San Diego: Academic Press.
- Lee, R.E. & Kugrens, P. 1991 *Katablepharis ovalis*, a colorless flagellate with interesting cytological characteristics. *J. Phycol.* 27, 505-513.
- Vørs, N. 1992. Ultrastructure and autecology of the marine, heterotrophic flagellate *Leucocryptos marina* (Braarud) Butcher 1967 (Katablepharidaceae/Kathablepharidae), with a discussion of the genera *Leucocryptos* and *Katablepharis*/ *Kathablepharis*. *Eur. J. Protistol.* 28, 369-389.

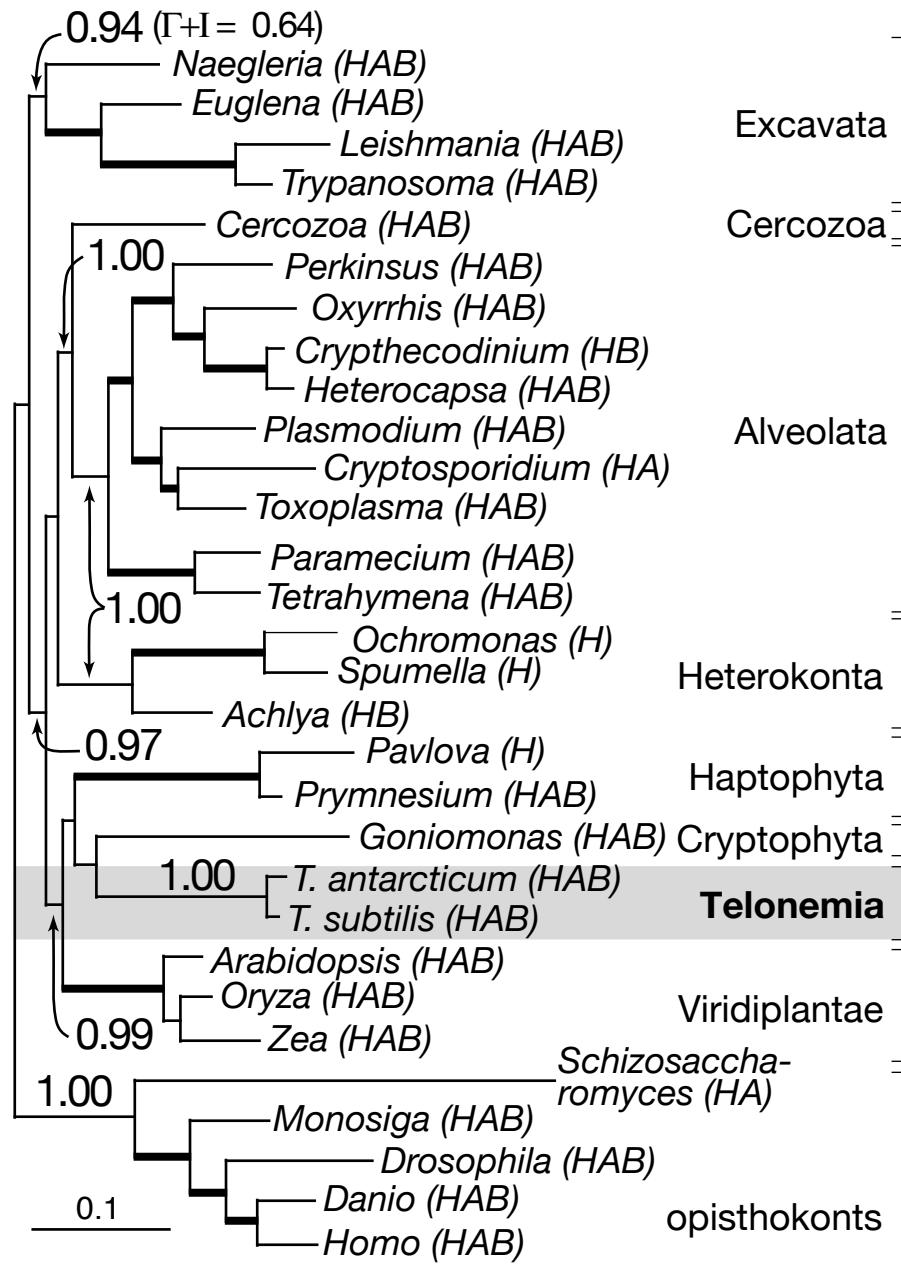

**Fig. S1.**

Phylogeny of *Telonema* inferred from concatenated HSP90+alpha+beta-tubulin sequences. Tree reconstructed using Bayesian inference and  $\Gamma$ +COV model. Posterior probability (PP) values  $> 0.9$  are depicted as numbers or thick branches. The monophyly of Excavata received substantially lower PP values from analyses using  $\Gamma$ +I substitution model: PP=0.64. Some of the taxa are chimeric, assembled from different species (see supplementary Table S1). Genes included in the concatenated sequences are written in parentheses, where H=HSP90, A=alpha-tubulin, B=beta-tubulin.
